# Supplementary material
Source: PubMed Central journal article supplement (PMC9126298)
Supplement: NIHMS1796978-supplement-Data_Captions.pdf [file NIHMS1796978-supplement-Data_Captions.pdf]

## Supplementary Data

**Data S1. Integrated association stringency (IAS) network.** The cancer protein network resource (containing multiple evidence types) stored in the Network Data Exchange (NDEx) database in Cytoscape (*138-140*) format is accessible from <http://ccmi.org/nest/>. An archived version of the same resource in the TSV (tab-separated values) format is available at (141).

**Data S2. IAS catalog of multi-scale protein systems.** A file containing 2337 protein systems of various sizes (multi-scale), derived from applying multiscale community detection methods on the IAS network, is available online(*142*).

**Data S3. NeST 1.0 hierarchical cancer systems map.** The interactive NeST 1.0 map, appearing as in **Fig. 4A**, is available at <http://ccmi.org/nest/>. NeST is browsable in multiple formats, including a hierarchical model on NDEx with linkouts to Cytoscape (*138-140*) and as a set of nested modules in the HiView web explorer. This map and two other versions with altered visual styles for highlighting CCMI modules and CNA modules (**Figs. S4 and S6**) is available as a Cytoscape file (.cys) online (*143*).
